# Supplementary material for: A cooperative template strategy to control the pore structure of ZIF-derived carbon for fuel cell cathodes
Source: Royal Society of Chemistry journal article supplement (doi:10.1039/d4ta00838c), 2024-01-01
Supplement: d4ta00838c1.pdf [file d4ta00838c1.pdf]

Supporting Information

## **Cooperative Template Strategy to Control Pore Structure of ZIF-Derived Carbon for Fuel Cell Cathode**

Zhihong Huang, Mingjia Lu, Sucheng Liu, Longhai Zhang, Yangyang Chen, Lecheng Liang, Jiayi Zhang, Huiyu Song, Li Du, and Zhiming Cui\*

Guangdong Provincial Key Laboratory of Fuel Cell Technology, School of Chemistry and Chemical Engineering, South China University of Technology, Guangzhou 510641, China.

**Corresponding Author:**

\*E-mail: zmcui@scut.edu.cn. (Prof. Zhiming Cui)

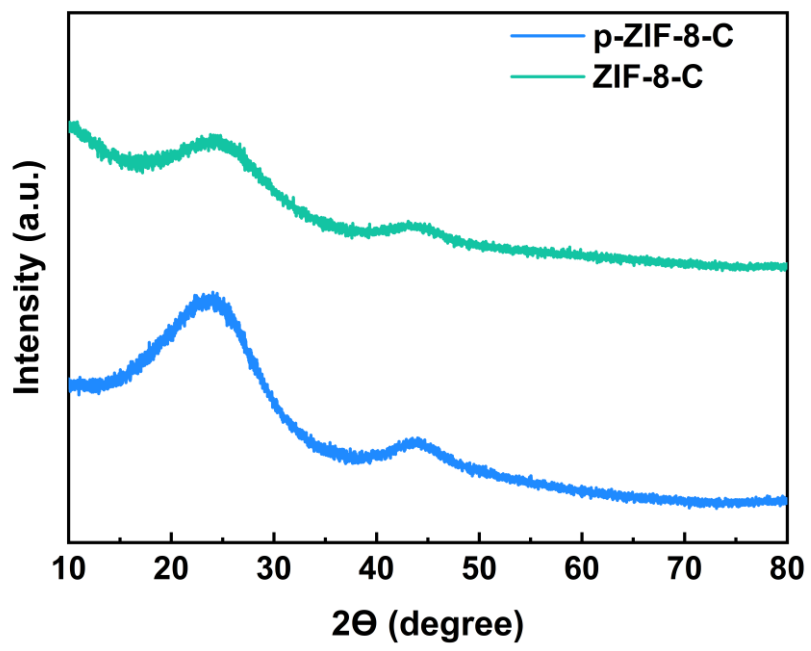

**Fig. S1.** XRD patterns of p-ZIF-8-C and ZIF-8-C.

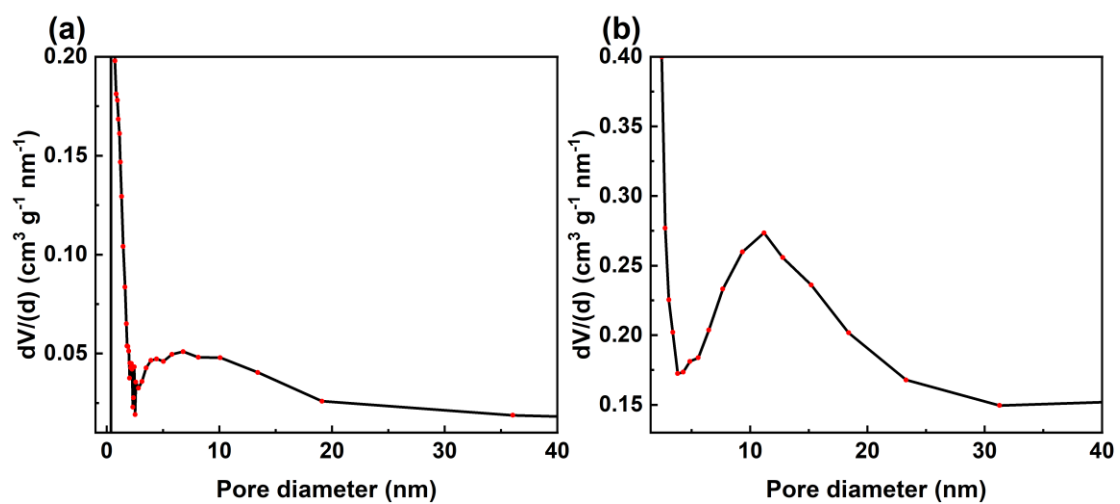

**Fig. S2.** Pore size distributions for p-ZIF-8-C with different molar amounts of SL (a) 2 mmol, (b) 5 mmol.

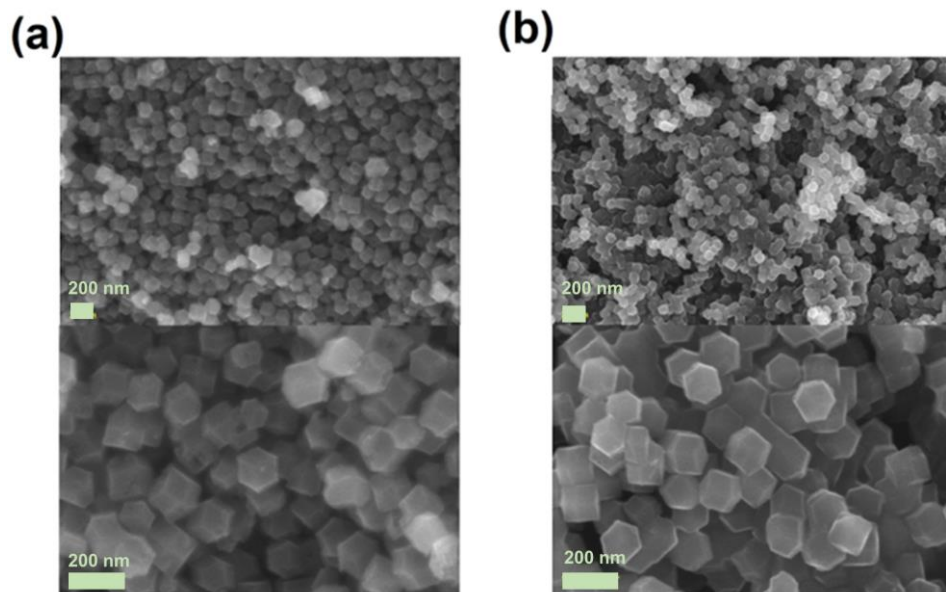

**Fig. S3.** SEM images of (a) p-ZIF-8-C and (b) ZIF-8-C.

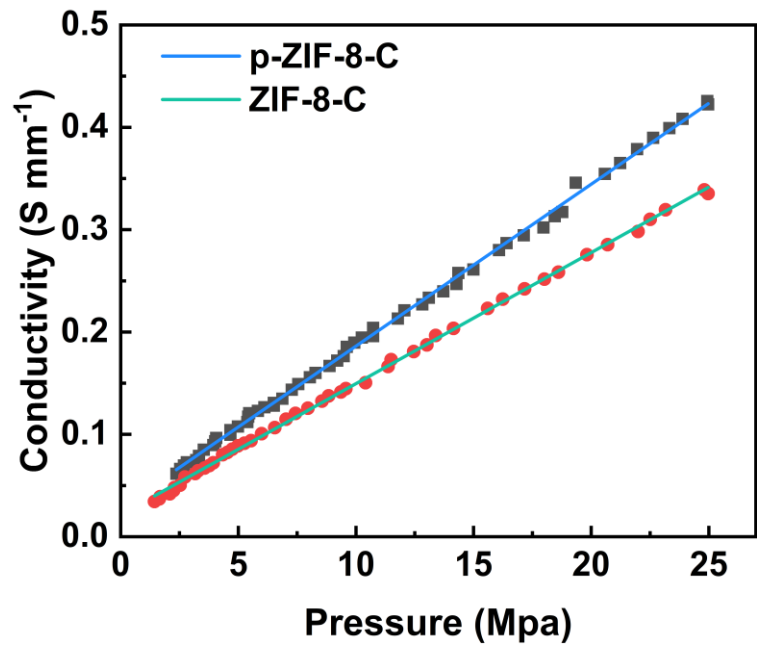

Fig. S4. Conductivity diagram of p-ZIF-8-C and ZIF-8-C.

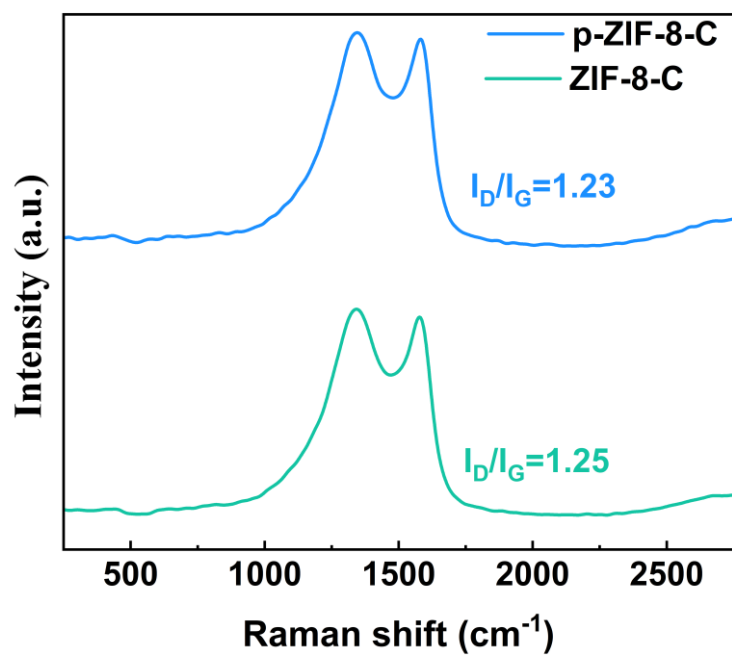

**Fig. S5.** Raman spectras of p-ZIF-8-C and ZIF-8-C.

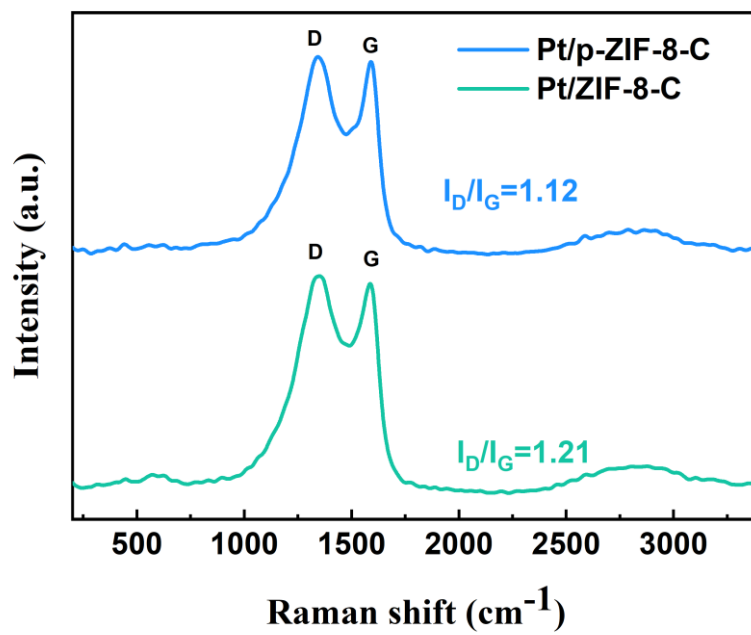

**Fig. S6.** Raman spectras of Pt/p-ZIF-8-C and Pt/ZIF-8-C.

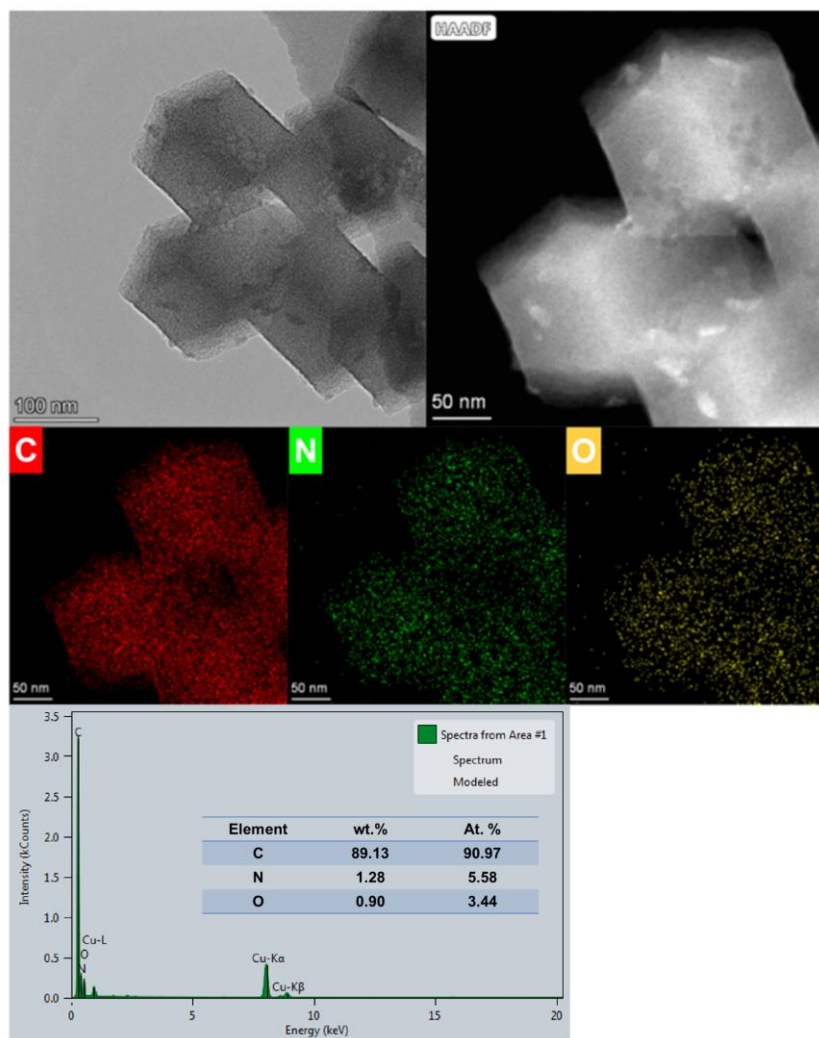

**Fig. S7.** HAADF-STEM image, elemental mappings of p-ZIF-8-C and the spectra along with wt.% and At.% of C, N and O in p-ZIF-8-C.



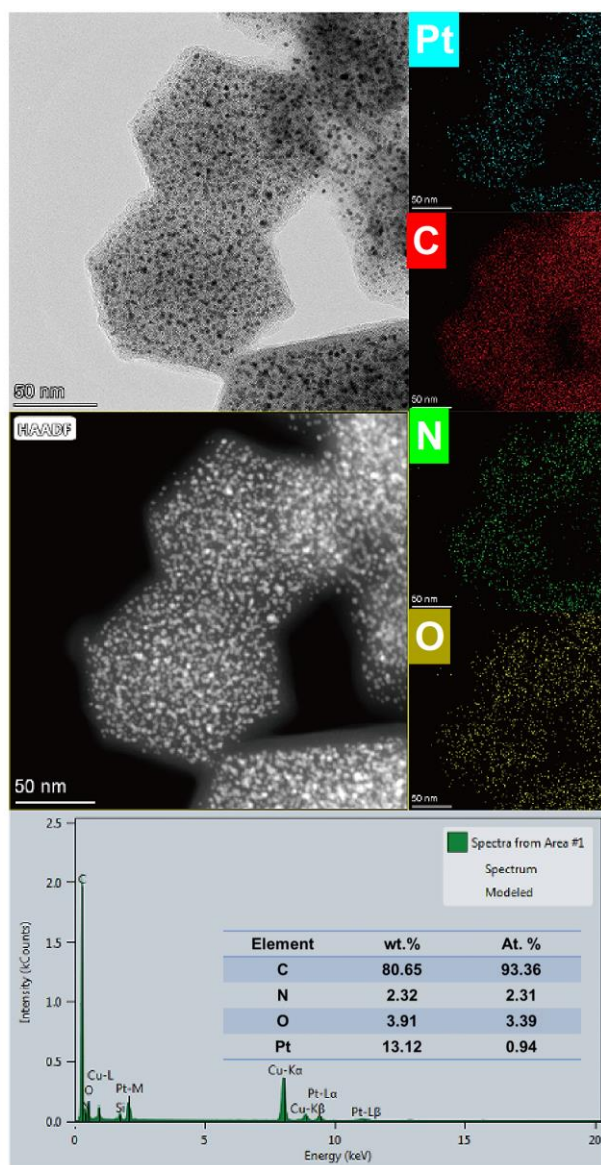

**Fig. S8.** HAADF-STEM image, elemental mappings of Pt/ZIF-8-C and the spectra along with wt.% and At.% of Pt, C, N and O in Pt/ZIF-8-C.

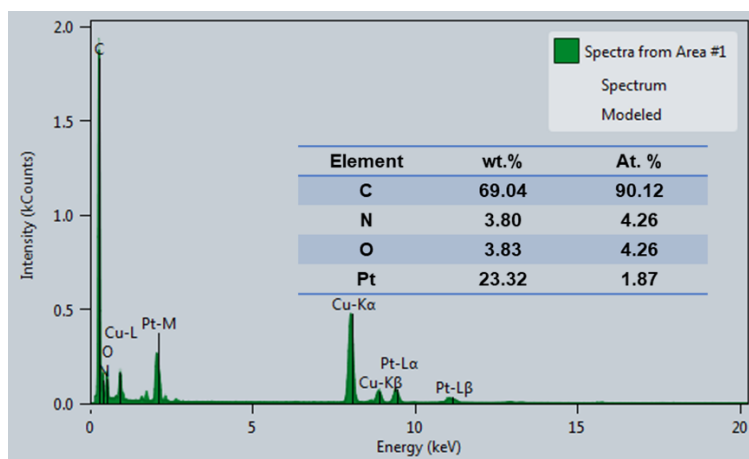

**Fig. S9.** The spectra along with wt.% and At.% of Pt, C, N and O in Pt/p-ZIF-8-C.

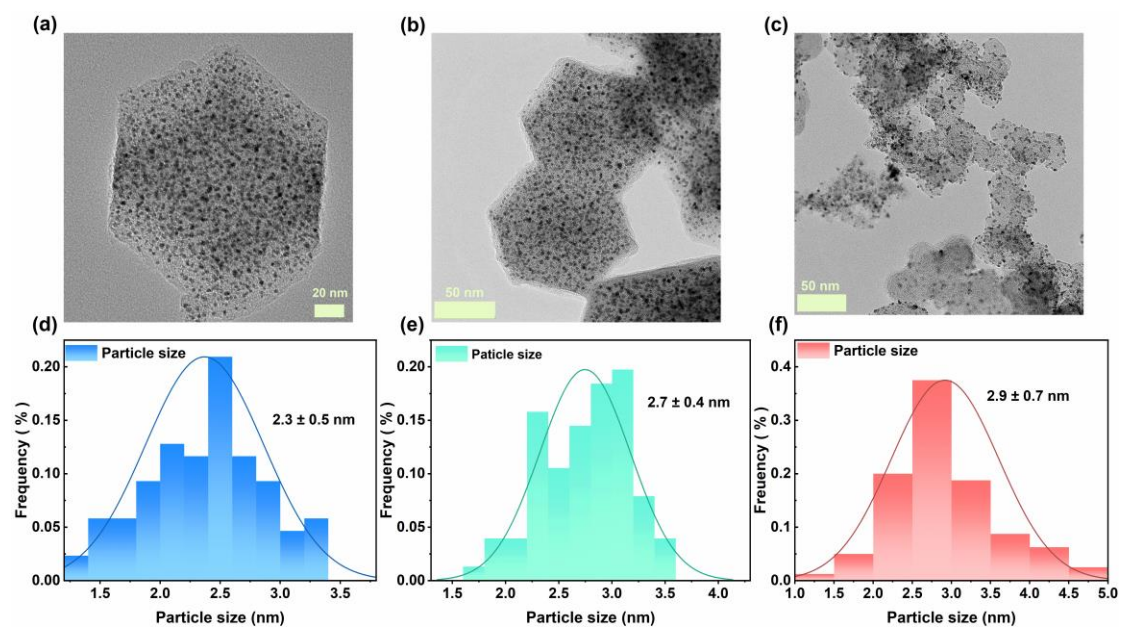

**Fig. S10.** TEM images and histograms of (a, d) Pt/p-ZIF-8-C, (b, e) Pt/ZIF-8-C, (c, f) JM 20wt.% Pt/C.

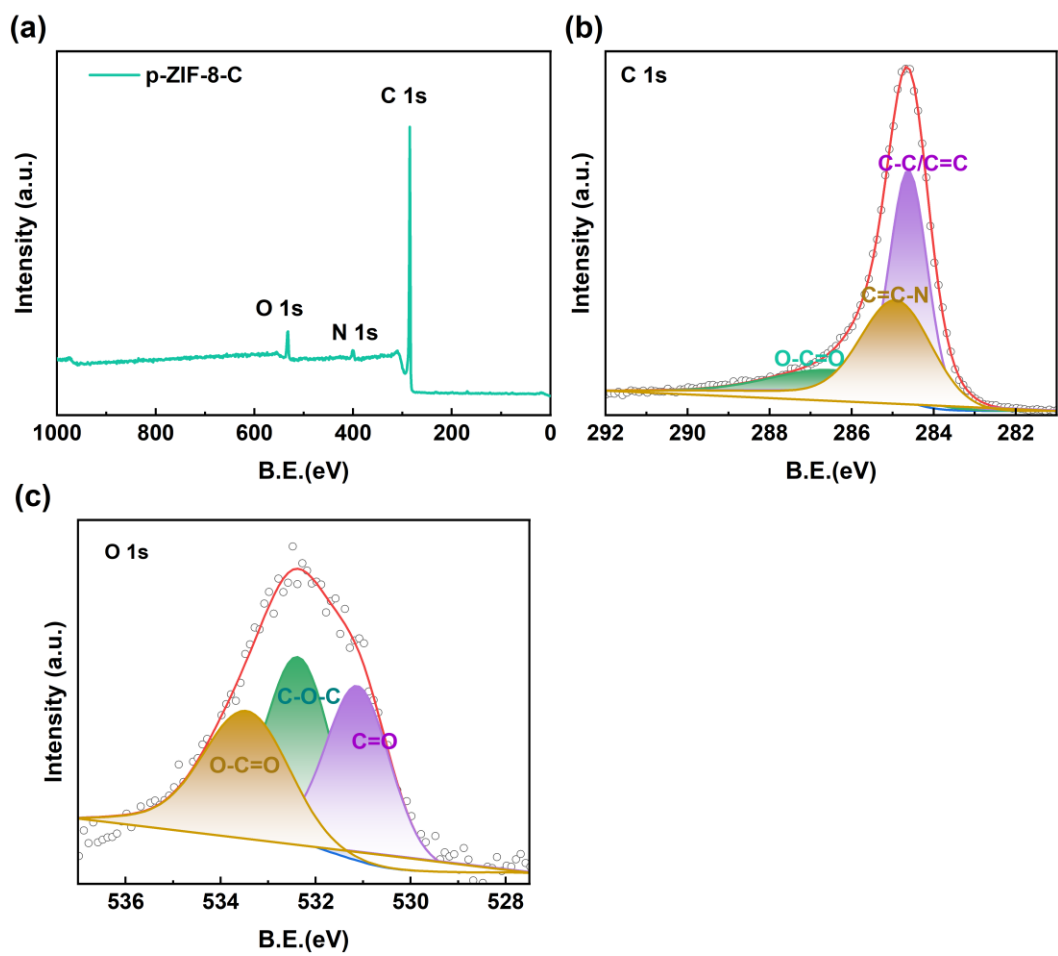

Fig. S11. (a) Survey XPS spectra, (b-c) C 1s and O 1s of p-ZIF-8-C.

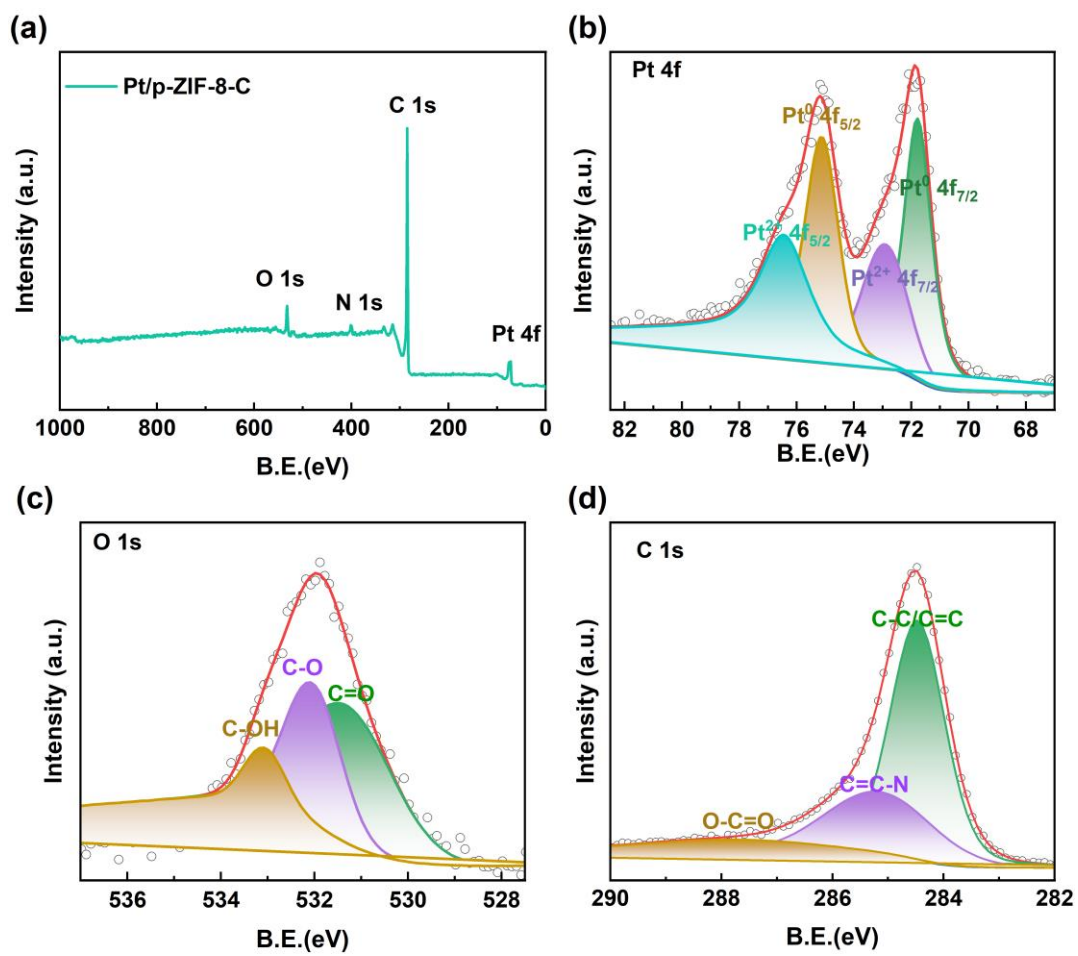

Fig. S12. (a) Survey XPS spectra, (b-d) Pt 4f, O 1s and C1s of Pt/p-ZIF-8-C.

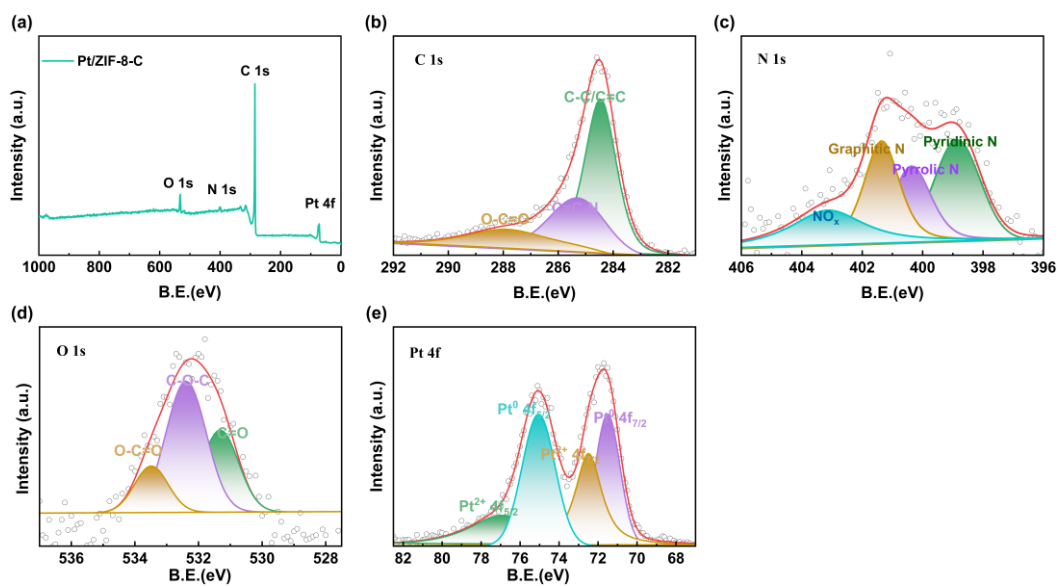

**Fig. S13.** (a) Survey XPS spectra, (b-e) C 1s, N 1s, O 1s and Pt 4f of Pt/ZIF-8-C.

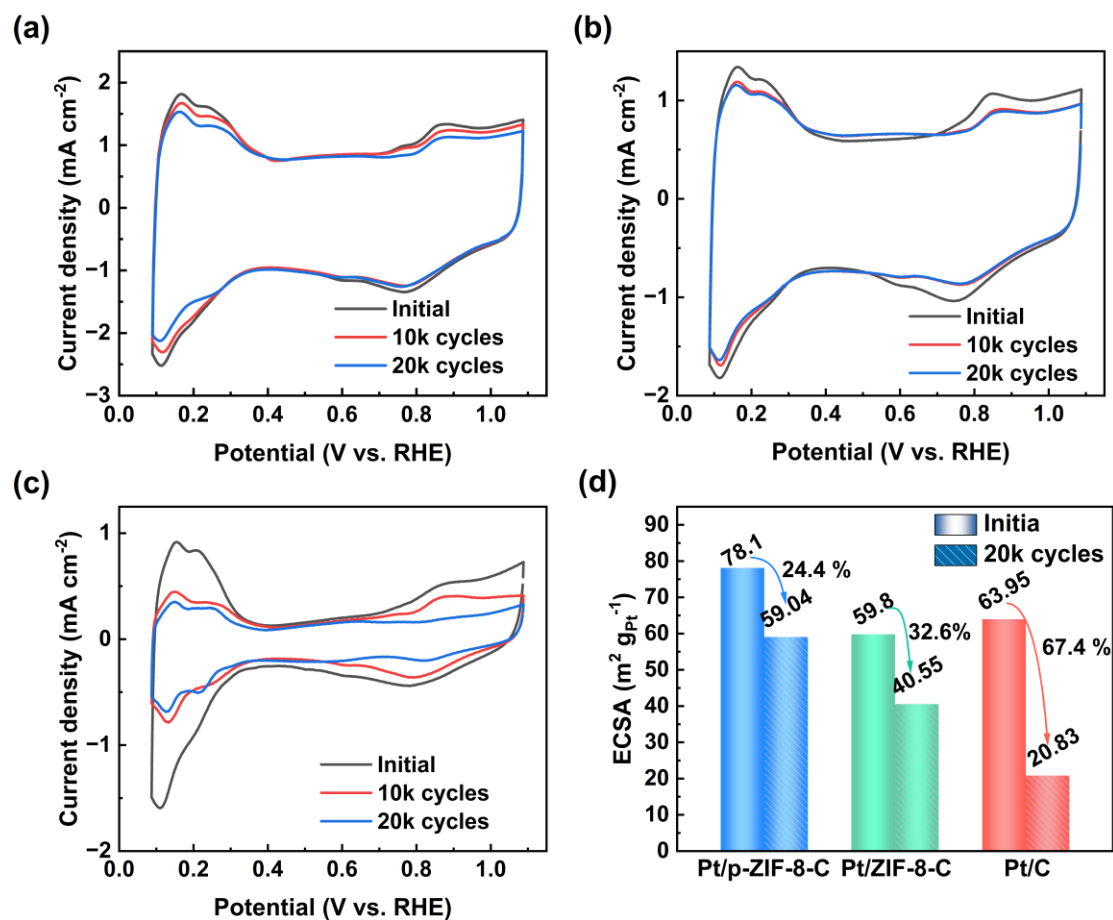

**Fig. S14.** (a-c) The CVs; (d) ECSA of Pt/p-ZIF-8-C, Pt/ZIF-8-C and JM 20wt.% Pt/C before and after 20k ADT.

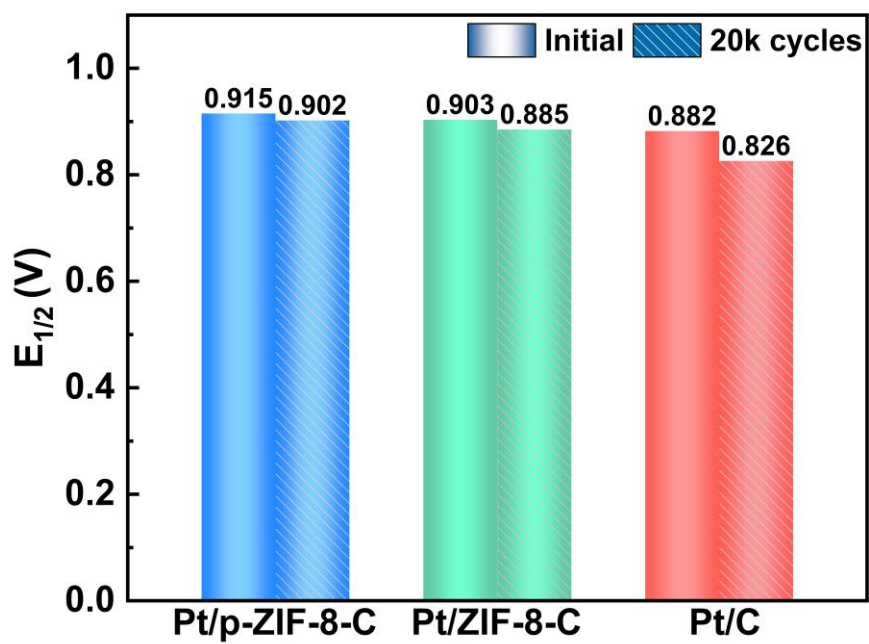

**Fig. S15.** The  $E_{1/2}$  of Pt/p-ZIF-8-C, Pt/ZIF-8-C and JM 20 wt.% Pt/C before and after 20k ADT.



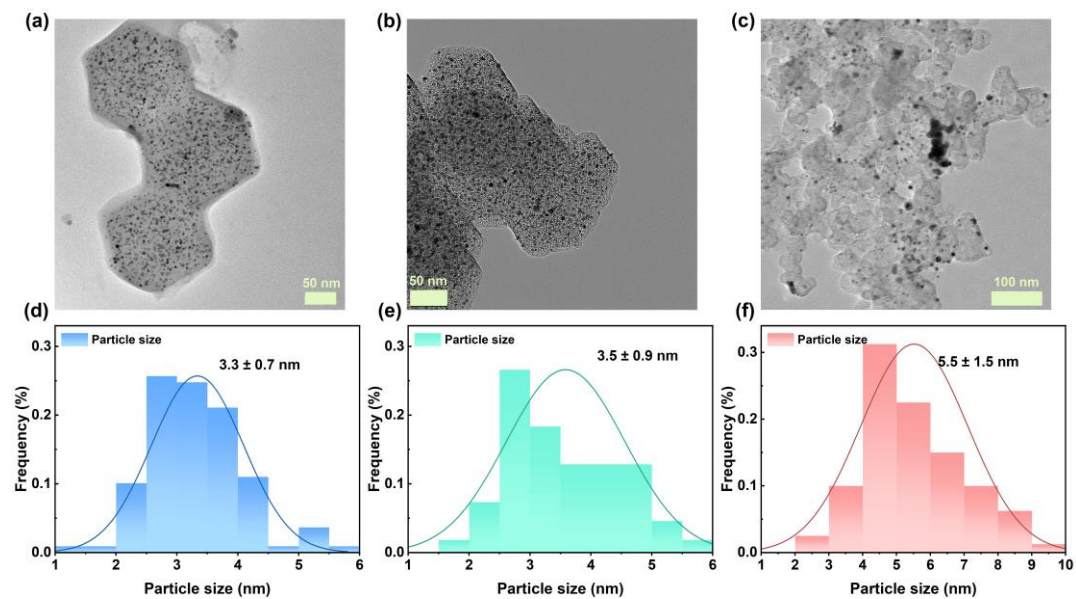

**Fig. S16.** TEM images and histograms of (a, d) Pt/p-ZIF-8-C, (b, e) Pt/ZIF-8-C, (c, f) JM 20 wt.% Pt/C after 20k ADT.

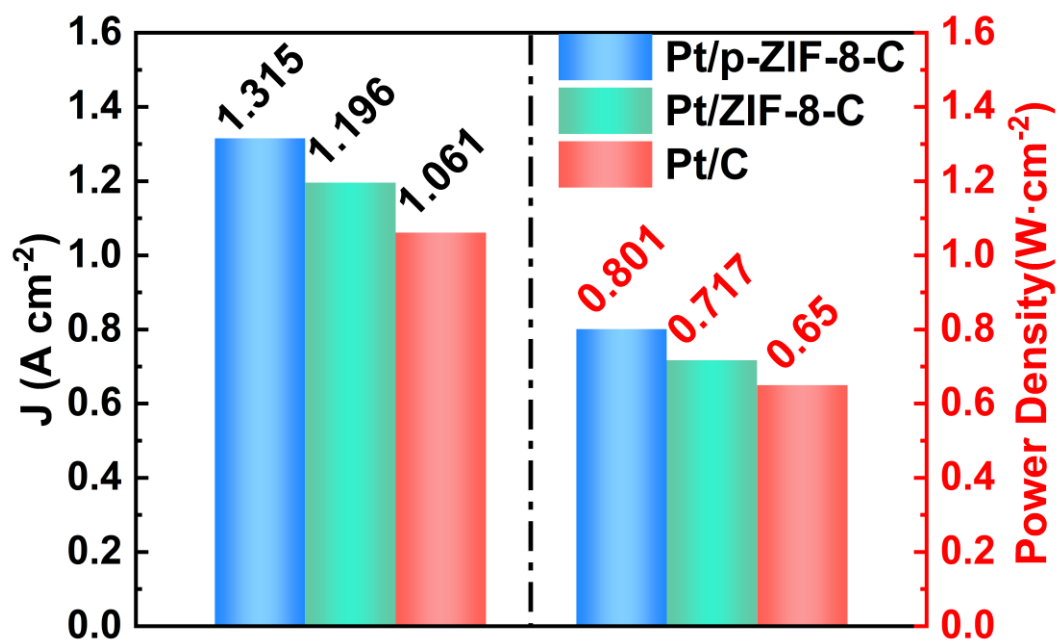

**Fig. S17.** histogram of current density at 0.6V and maximum power density of Pt/p-ZIF-8-C, Pt/ZIF-8-C and JM 20 wt.% Pt/C as the cathode.

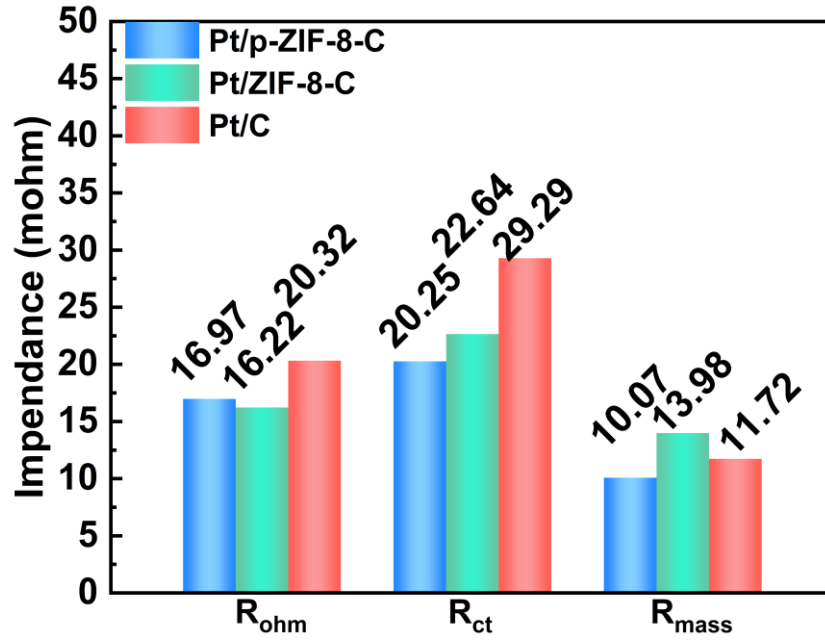

**Fig. S18.** Impedance of each part for Pt/p-ZIF-8-C, Pt/ZIF-8-C and 20 wt.% Pt/C measured at  $800 \text{ mA cm}^{-2}$  under 100% RH.

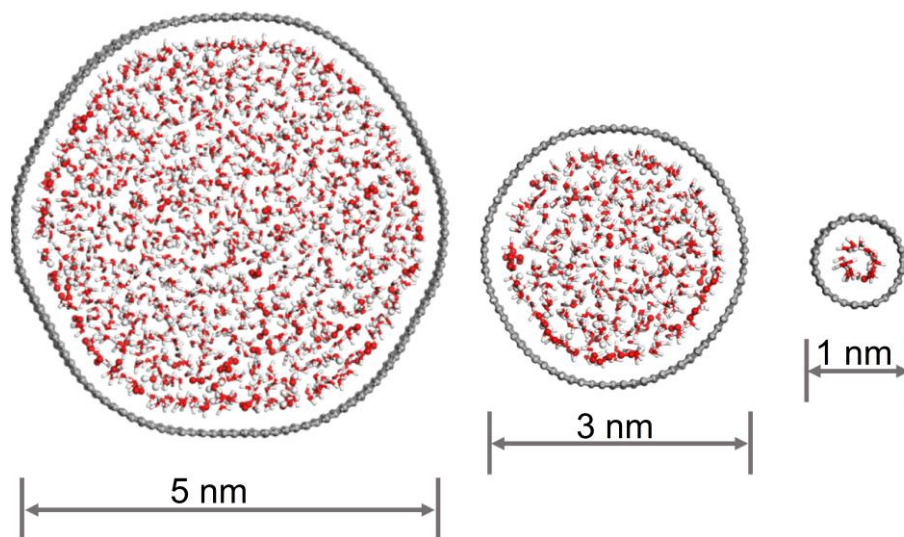

**Fig. S19.** Structure models of different pores for MD simulation.

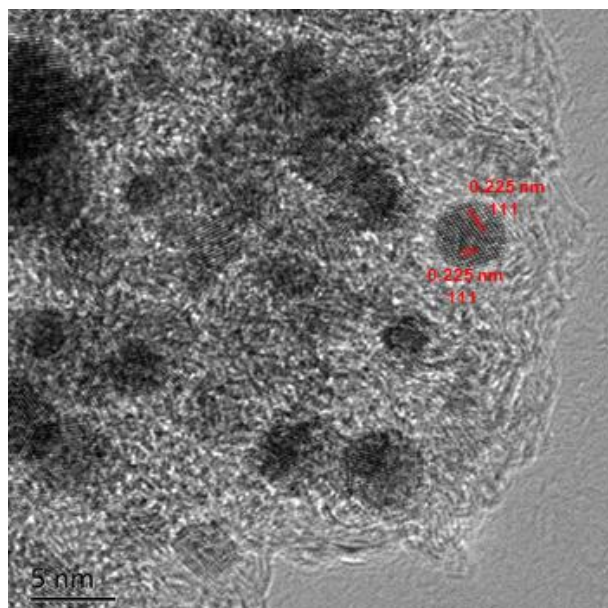

**Figure S20.** HR-TEM image of Pt NPs;

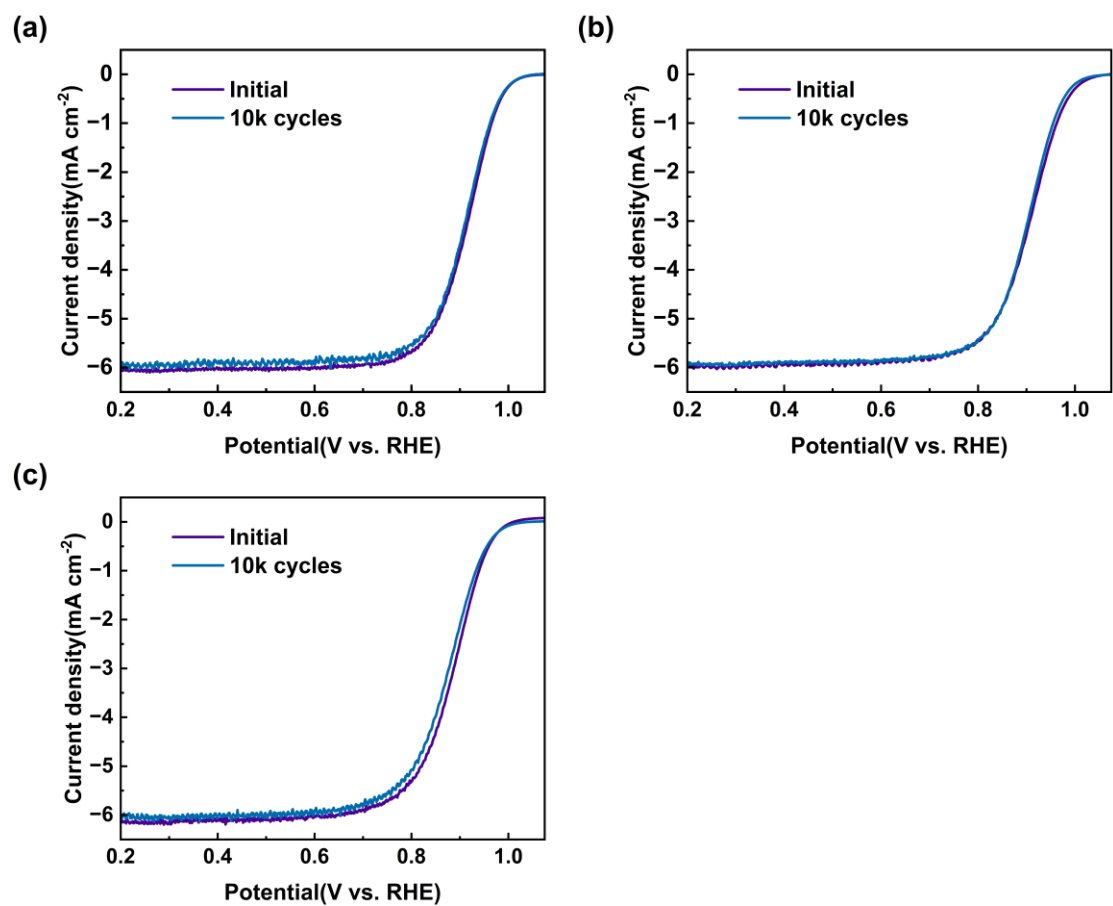

**Fig. S21.** LSV curves of (a) Pt/p-ZIF-8-C, (b) Pt/ZIF-8-C and (c) JM 20.wt% Pt/C after AST test under a high potential range (1.0–1.5 V).

**Table S1.** Performance comparisons of different ORR catalysts in RDE.

| Catalyst                                                  | $E_{1/2}$ / V vs RHE | Mass activity ( $A\ mg_{Pt}^{-1}$ ) | Ref.                                                   |
|-----------------------------------------------------------|----------------------|-------------------------------------|--------------------------------------------------------|
| Pt/p-ZIF-8-C                                              | <b>0.915</b>         | <b>0.44</b>                         | <b>This work</b>                                       |
| Pt/ZIF-8-C                                                | <b>0.903</b>         | <b>0.32</b>                         |                                                        |
| Pt-Nb <sub>2</sub> O <sub>5</sub>                         | —                    | 0.220                               | <i>ACS Catal.</i> <b>2022</b> , 12, 13523-13532.       |
| 40% Pt-Co <sub>6</sub> Mo <sub>6</sub> C <sub>2</sub> /gC | 0.92                 | 0.271                               | <i>J. Am. Chem.Soc.</i> <b>2012</b> , 13, 1954-1957.   |
| Pt/ALDTa <sub>2</sub> O <sub>5</sub> /C                   | 0.891                | 0.222                               | <i>Nano Energy</i> <b>2018</b> , 53, 716-725.          |
| Pt/N-ALDTa <sub>2</sub> O <sub>5</sub> /C                 | 0.908                | 0.280                               |                                                        |
| Pt/N,P-CNTs                                               | 0.91                 | 0.285                               | <i>Electrochim. Acta</i> <b>2015</b> , 158, 374-382.   |
| Pt/N-CNTs                                                 | 0.87                 | 0.165                               |                                                        |
| Pt/SG (sulfur-doped-graphene)                             | —                    | 0.139                               | <i>Adv. Funct. Mater.</i> <b>2014</b> , 24, 4325-4336. |
| Pt/G (graphene)                                           | —                    | 0.101                               |                                                        |
| Pt-SA/NCx                                                 | 0.935                | 0.58                                | <i>Adv. Funct. Mater.</i> <b>2023</b> , 33 , 2302582.  |
| Pt/OMC-CNT                                                | —                    | 0.232                               | <i>J. Mater. Chem. A</i> <b>2013</b> , 1, 1270-1283    |
| Pt/cPDA                                                   | —                    | 0.94                                | <i>Nat. Commun.</i> <b>2022</b> , 13, 6157.            |
